# Supplementary material for: A novel humanized mouse model to study the function of human cutaneous memory T cells in vivo in human skin
Source: PubMed Central journal article supplement (PMC7341892; doi:10.1038/s41598-020-67430-7), 2020-07-07
Supplement: 41598_2020_67430_MOESM1_ESM.pdf [file 41598_2020_67430_MOESM1_ESM.pdf]

# Supplementary data

**A novel humanized mouse model to study the function of human cutaneous memory T cells *in vivo* in human skin**

**Short title: *Cutaneous T cells in a skin-humanized mouse model***

Maria M. Klicznik<sup>1</sup>, Ariane Benedetti<sup>1</sup>, Laura M. Gail<sup>1</sup>, Suraj R. Varkhande<sup>1</sup>, Raimund Holly<sup>1</sup>, Martin Laimer<sup>2</sup>, Angelika Stoecklinger<sup>1</sup>, Andreas Sir<sup>3</sup>, Roland Reitsamer<sup>3</sup>, Theresa Neuper<sup>1</sup>, Jutta Horejs-Hoeck<sup>1</sup>, Michael D. Rosenblum<sup>4</sup>, Daniel J. Campbell<sup>5</sup>, Eva M. Murauer<sup>6</sup>, Iris K. Gratz<sup>1,5,6</sup>

<sup>1</sup> Department of Biosciences, University of Salzburg, Salzburg, Austria

<sup>2</sup> Department of Dermatology, University Hospital of the Paracelsus Medical University Salzburg, Austria

<sup>3</sup>Breast Center, University Hospital of the Paracelsus Medical University Salzburg, Austria

<sup>4</sup>Department of Dermatology, University of California, San Francisco CA 94143, USA.

<sup>5</sup>Benaroya Research Institute, 1201 9th AVE, Seattle, WA 98101 USA

<sup>6</sup>Division of Molecular Dermatology and EB House Austria, Department of Dermatology, Paracelsus Medical University Salzburg, Austria

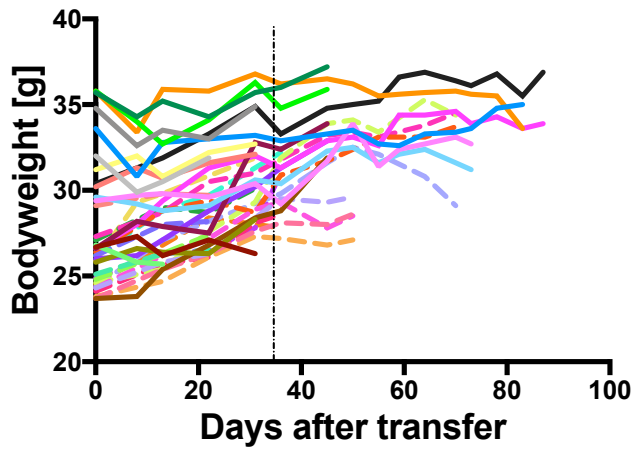

**Supplementary Figure 1: Body weight curves of experimental mice after adoptive transfer human PBMC.** NSG mice were adoptively transferred with human PBMC and weight was measured at indicated time points. Graph shows 2 representative experiments of 2 different PBMC donors (full lines and dotted lines) after adoptive transfer of  $2.5 \times 10^6$  PBMC;  $n=36$ . Vertical black dotted line represents the limit of 35 days for all further experiments using huPBMC-ES-NSG mice.

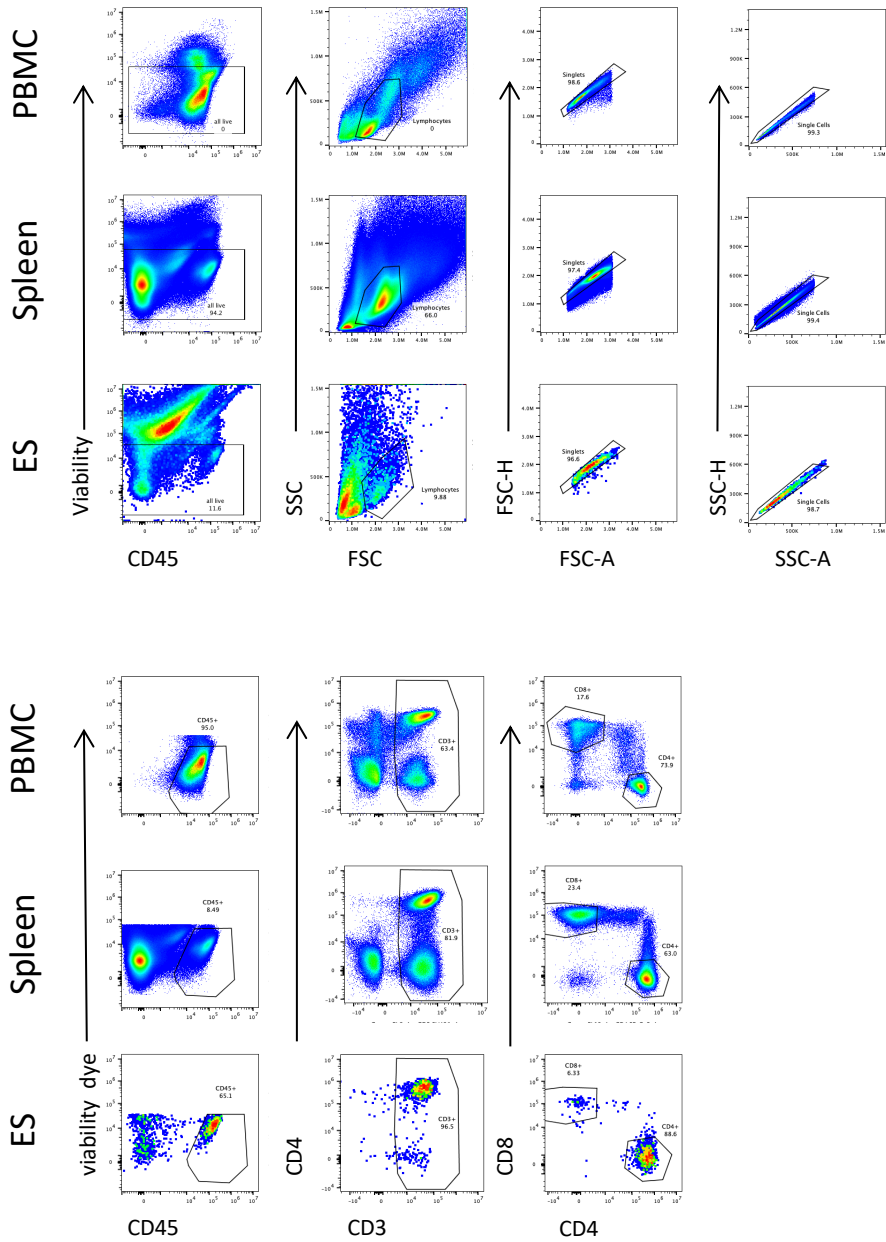

**Supplementary Figure 2: Gating strategy for flow cytometric analysis of human PBMC, spleen and ES single-cell suspensions**

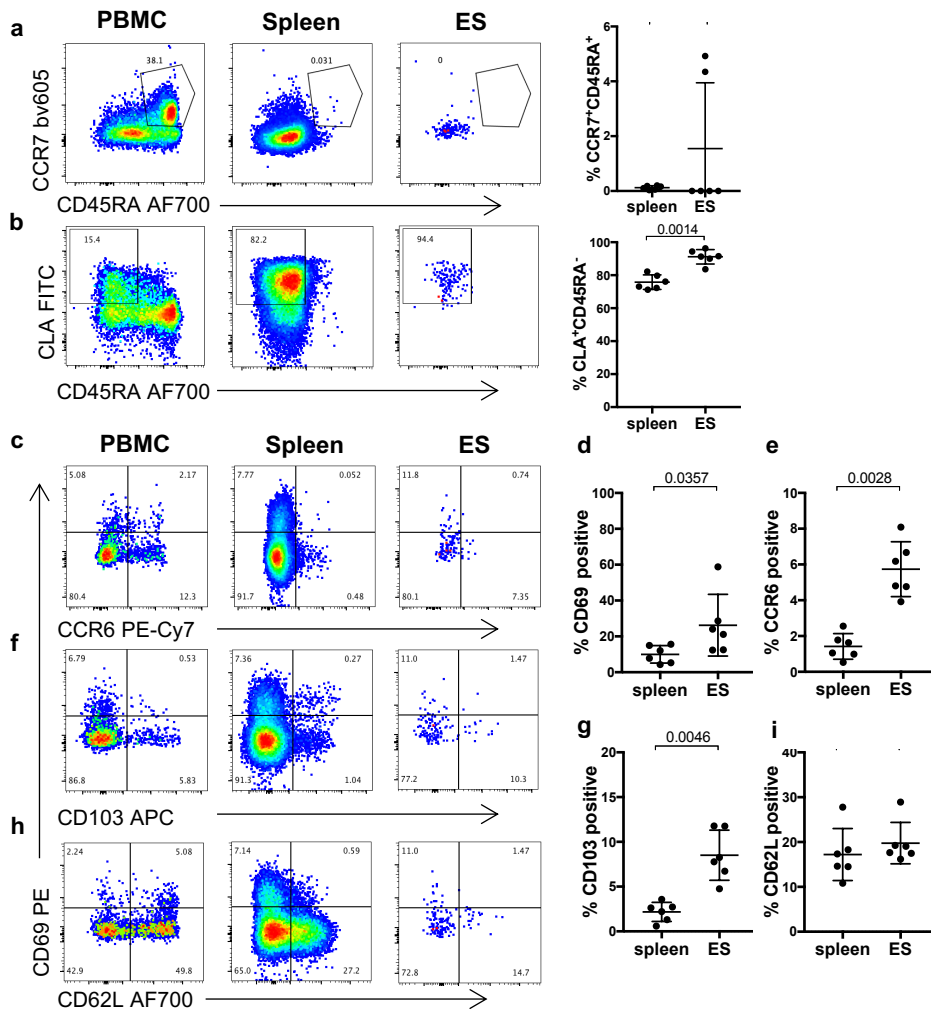

**Supplementary Figure 3: Skin and spleen infiltrating CD8<sup>+</sup> T cells show skin-homing memory phenotype and upregulate markers of tissue residency and skin-tropism in human ES.** Representative flow cytometry analysis of (a) CCR7 and CD45RA expression, and (b) CLA and CD45RA expression by gated CD4<sup>+</sup>CD3<sup>+</sup>CD45<sup>+</sup> live leukocytes from blood of healthy donors, spleen and ES of huPBMC-ES-NSG mice and graphical summary of the proportions of indicated cells by gated CD4<sup>+</sup>CD3<sup>+</sup>CD45<sup>+</sup> live leukocytes. n=5-6/experiment; cumulative data of 2 independent experiments. (c, f, h) Representative flow cytometry analysis for expression of (c) CCR6 and CD69; (f) CD103 and (h) CD62L in indicated tissues by gated CLA<sup>+</sup>CD45RA<sup>+</sup>CD4<sup>+</sup>CD3<sup>+</sup> live cells from blood of healthy donors, spleen and ES of huPBMC-ES-NSG mice. (d, e, g, i) Graphical summary of the expression of the indicated markers by CLA<sup>+</sup>CD45RA<sup>+</sup>CD4<sup>+</sup>CD3<sup>+</sup> living cells isolated from spleen and ES. Each dot represents an individual animal; Significance determined by paired student's t test; mean +/- SD

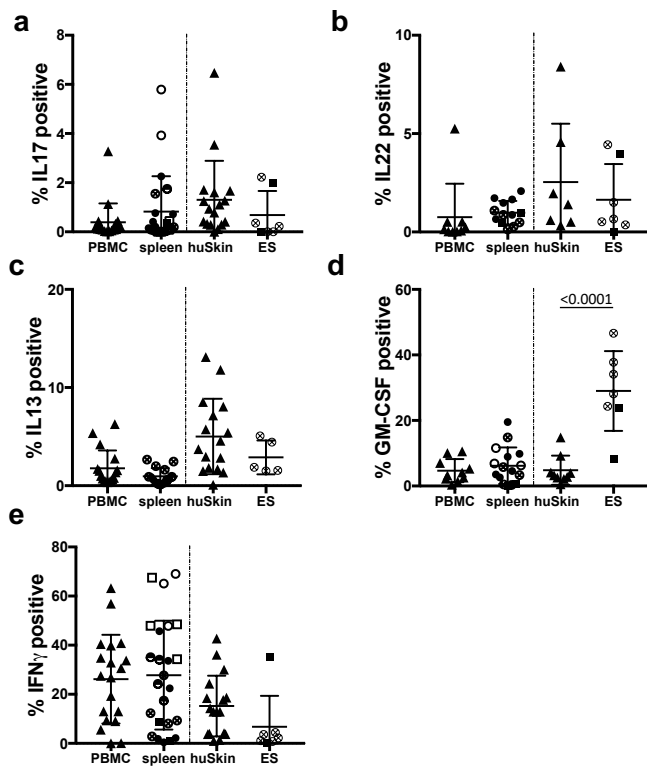

**Supplementary Figure 4: Engrafted splenic and cutaneous human CD8<sup>+</sup> T cells reflect diverse phenotypes of T cells in human tissues.** Single cell suspensions of blood and skin of healthy donors, and spleen and ES of huPBMC-ES-NSG mice were prepared 18-35 days after PBMC transfer, stimulated *ex vivo* with PMA/ionomycin and intracellular cytokine production was analyzed by flow cytometry. (a-e) Graphical summary of flow cytometry analysis of IL17, IL22, IL13, GM-CSF and IFN $\gamma$  producing CD8<sup>+</sup>CD3<sup>+</sup>CD45<sup>+</sup> gated live leukocytes from blood and skin of healthy donors and spleen and ES of huPBMC-ES-NSG mice as indicated upon *ex vivo* stimulation with PMA/Ionomycin and intracellular staining. n=3-6/ experiment; combined data of 1-4 independent experiments, as indicated by the different fillings of the symbols.

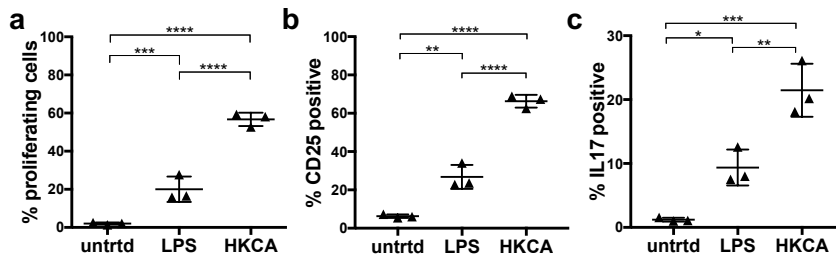

**Supplementary Figure 5: Heat killed *C.alibicans* presented by moDCs leads to proliferation and activation of CD4<sup>+</sup> T cells.** PBMC were cultured *in vitro* in the presence of monocyte-derived DCs (moDC) for 7 days and the proliferation, CD25 expression and cytokine production of CD4<sup>+</sup> T cells gated by CD3<sup>+</sup>CD45<sup>+</sup> live leukocytes was assessed by flow cytometry. (a) Graphical summary of proliferating CD4<sup>+</sup> T cells and expression of the indicated markers by of human PBMC with autologous non-activated moDC (untrtd), LPS loaded moDC (LPS) or HKCA loaded moDC (HKCA). PBMC were stained with the cell proliferation dye eFluor 450 to identify proliferating cells. n=3/group. P values indicated as asterisk: \*  $\leq$  0.05; \*\*  $\leq$  0.01, \*\*\*  $\leq$  0.001, \*\*\*\*  $\leq$  0.0001

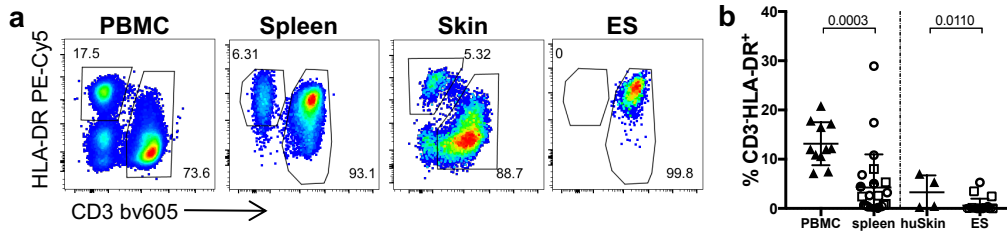

**Supplementary Figure 6: CD3<sup>+</sup>HLA-DR<sup>+</sup> antigen presenting cells do not engraft well within huPBMC-ES-NSG. a)** Representative flow cytometry analysis of CD3<sup>+</sup>HLA-DR<sup>+</sup> cells in human PBMC, skin and spleen and ES of huPBMC-ES-NSG and **(b)** graphical summary of CD3<sup>+</sup>HLA-DR<sup>+</sup> cells gated on live CD45<sup>+</sup> leukocytes. n=4-6/group, combined data of 1-5 independent experiments, as indicated by the fillings of the symbols.

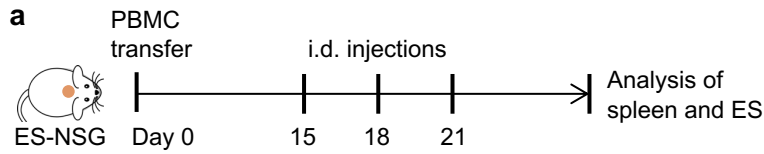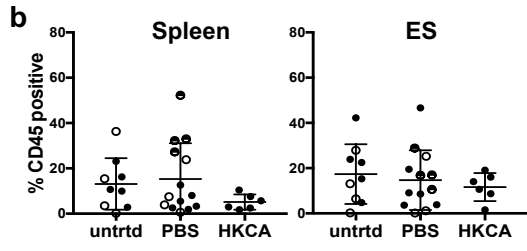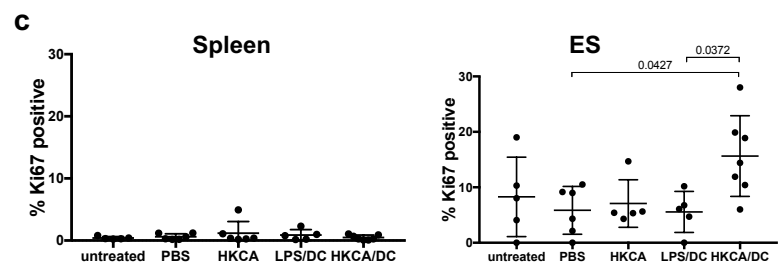

**Supplementary Figure 7: Free heat killed *C.alibicans* fails to elicit proliferation and activation of CD4<sup>+</sup> T cells. (a)** Experimental procedure of the injection of  $1 \times 10^6$ /ml free HKCA cells into the ES. Single cell suspensions of indicated organs were analyzed by flow cytometry. **(b)** Graphical summary of human CD45<sup>+</sup> cell proportions of live leukocytes in spleen and ES of mice that were left untreated (untrtd), injected with PBS or free HKCA. n=3-5/group, combined data of 1-3 independent experiments Statistical significance determined by ANOVA and Tuckey's test for multiple comparison; mean +/-SD. **(c)** The ES of huPBMC-ES-NSG mice were injected with PBS, free HKCA, LPS-activated moDC or HKCA-loaded moDC and harvested 7 days after the last injection similar to (a). Graphical summary of the fraction of Ki67<sup>+</sup> CD4<sup>+</sup> cells within the spleen and ES after i.d. injections of the ES as indicated, gated on viable CD45<sup>+</sup>CD3<sup>+</sup> cells.



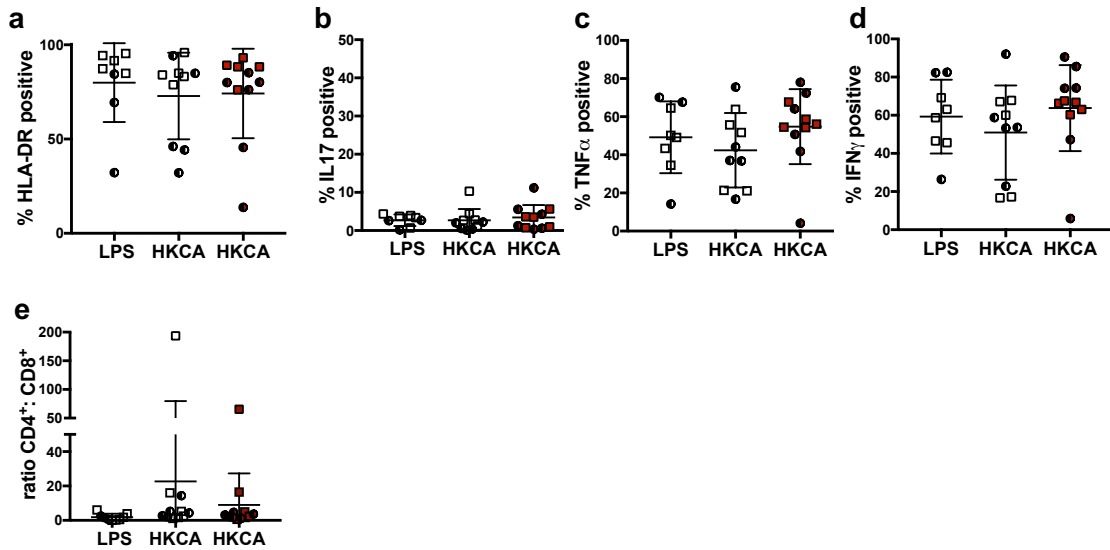

**Supplementary Figure 8: Splenic T cell are not activated by an allogeneic ES or by HKCA presented in the ES.**

NSG mice bearing fully healed ES of one of two different skin donors (A and B) were adoptively transferred with either skin donor-matched PBMC or skin donor-mismatched PBMC. Intradermal injections of donor A derived LPS/moDC or HKCA/moDC were performed as depicted in Fig. 6 (i.e. leukocytes were matched). Single cell suspensions of spleens were analyzed by flow cytometry after *ex vivo* stimulation with PMA/Ionomycin and intracellular staining. **(a)** Graphical summary of the expression of HLA-DR by CD4<sup>+</sup> T cells of CD3<sup>+</sup>CD45<sup>+</sup> live leukocytes isolated from the spleen of huPBMC-ES-NSG mice after intradermal injection of LPS/moDC (LPS) or HKCA/moDC (HKCA) into ES matched (black or empty symbols) or mismatched (red symbols) to the leukocytes. **(a-d)** Splenocytes were stimulated with PMA/ionomycin *ex vivo* and intracellular cytokine production of the indicated cytokines analyzed by flow cytometry. **(e)** Ratio of CD4<sup>+</sup> to CD8<sup>+</sup> cells in spleens of huPBMC-ES-NSG mice, gated on CD3<sup>+</sup>CD45<sup>+</sup> live leukocytes. Each symbol represents a single animal, data compiled from 2-5 independent experiments as indicated by the fillings of the symbols.

**Table S1: Detailed list of antibodies and reagents****Tissue preparation**

| Reagent                     | Company       | Catalog number |
|-----------------------------|---------------|----------------|
| Collagenase Type 4          | Worthington   | LS004186       |
| DNAse                       | Sigma-Aldrich | DN25           |
| RPMI 1640                   | Gibco         | 31870074       |
| human serum                 | Sigma-Aldrich | H5667/H4522    |
| Penicillin/streptavidin     | Sigma-Aldrich | P0781          |
| L-Glutamine                 | Gibco         | A2916801       |
| NEAA                        | Gibco         | 11140035       |
| Sodium-Pyruvat              | Sigma-Aldrich | S8636          |
| β-Mercaptoethanol           | Gibco         | 31350-010      |
| PBS                         | Gibco         | 14190169       |
| Ficoll Paque Plus           | GE-Healthcare | GE17-1440-02   |
| Protease Inhibitor Cocktail | Sigma-Aldrich | P8340          |

**Cellular activation**

| Reagent                                                      | Company       | Catalog number    |
|--------------------------------------------------------------|---------------|-------------------|
| Brefeldin A                                                  | Sigma-Aldrich | B6542             |
| Cytofix/Cytoperm kit                                         | BD            | RUO 554714        |
| Foxp3 / Transcription Factor Staining Buffer Set             | Invitrogen    | 00-5523-00        |
| Ionomycin                                                    | Sigma-Aldrich | I06434            |
| PMA                                                          | Sigma-Aldrich | P8139             |
| Recombinant human IL2                                        | Immunttools   | 11340023          |
| Recombinant human IL4                                        | Immunttools   | 11340047          |
| Recombinant human GM-CSF                                     | Immunttools   | 11343127          |
| Purified NA/LE Mouse anti-human CD28 (CD28.2)                | BD            | 555725            |
| Functional Grade, CD3 monoclonal Antibody (OKT3)             | eBioscience   | 16-0037-85        |
| Cytokine/Chemokine/Growth Factor 45-Plex Human ProcartaPlex™ | Invitrogen    | EPX-450-12171-901 |

**Skin cell culture and transplantation**

| Reagent        | Company    | Catalog number |
|----------------|------------|----------------|
| Epilife        | Gibco      | MEPICF500      |
| DMEM           | Gibco      | 11960-044      |
| MEM            | Gibco      | 11380037       |
| TrypLE express | Gibco      | 12604021       |
| Primocin       | invitrogen | ant-pm-1       |
| X-VIVO 15      | Lonza      | 881028         |

**Tissue preparation from mice**

| Reagent                                   | Company       | Catalog number |
|-------------------------------------------|---------------|----------------|
| BD Pharm Lyse                             | BD            | 555899         |
| Collagenase from Clostridium histolyticum | Sigma-Aldrich | C9407          |
| Hyaluronidase                             | Sigma-Aldrich | H3506          |

**Histology**

| Reagent                                   | Company    | Catalog number |
|-------------------------------------------|------------|----------------|
| Cell Conditioning 1 (CC1)                 | Roche      | 950-124        |
| Eosin Y aqueous solution                  | Sigma      | HT110232       |
| Hemalum solution acid acc. to Mayer       | Carl Rorth | T865.1         |
| Human Cytokeratin 5/6 (D5/16B4)           | Roche      | 790-4554       |
| ProLong™ Gold Antifade Mountant with DAPI | Invitrogen | P36931         |
| TissueTek O.C.T. Compound                 | Sakura     | TTEK           |
| ultraView Universal DAB Detection kit     | Roche      | 760-500        |

**Antibodies**

| Reagent                        | Company     | Catalog number |
|--------------------------------|-------------|----------------|
| CLA FITC (HECA-452)            | Biolegend   | 321306         |
| CLA bv605 (HECA-452)           | BD          | 563960         |
| CD1a FITC (HI149)              | BioLegend   | 300104         |
| CD3 PerCP-Cy5.5 (OKT3)         | eBioscience | 45-0037-42     |
| CD3 BV421 (UCHT1)              | BioLegend   | 300434         |
| CD3 bv605 (SK7)                | BioLegend   | 344835         |
| CD3 PE (HIT3a)                 | BD          | 561803         |
| CD3 PE-Cy5.5 (UCHT1)           | eBioscience | 15-0038-42     |
| CD4 PE-594 (RPA-T4)            | BioLegend   | 300548         |
| CD4 PE-Cy5 (RPA-T4)            | BioLegend   | 300510         |
| CD4 Alexa Fluor 700 (RPA-T4)   | Biolegend   | 300526         |
| CD4 bv500 (RPA-T4)             | BD          | 560768         |
| CD8 PE (OKT8)                  | eBioscience | 12-0086-42     |
| CD8 Pacific Orange (3B5)       | eBioscience | MHCD0830       |
| CD8 bv510 (RPA-T8)             | BioLegend   | 301048         |
| CD14 bv421 (M5E2)              | BioLegend   | 301830         |
| CD25 PE-Cy5                    | BioLegend   | 302608         |
| CD25 PE-Cy7 (BC96)             | eBioscience | 302612         |
| CD45 PerCP-Cy5.5 (HI30)        | BD          | 564105         |
| CD45 APC (HI30)                | eBioscience | 17-0459-42     |
| CD45 BV785 (HI30)              | BioLegend   | 304048         |
| CD45RA PE-e610 (HI100)         | eBioscience | 61-0458-42     |
| CD45RAPerCP-Cy5.5 (HI100)      | BioLegend   | 304122         |
| CD45RA Alexa Fluor 700 (HI100) | BioLegend   | 304120         |
| CD62L AF700 (DREG-56)          | Biolegend   | 304820         |
| CD69 PE (FN50)                 | BioLegend   | 310906         |
| CD69 PerCP/eFluor710 (FN50)    | eBioscience | 46-0699-42     |
| CD86 PE (B7-2)                 | eBioscience | 12-0869-41     |

|                                                                                 |                                                                           |            |
|---------------------------------------------------------------------------------|---------------------------------------------------------------------------|------------|
| CCR6 PE-Cy7 (G034E3)                                                            | BioLegend                                                                 | 353418     |
| CCR7 bv605 (G043H7)                                                             | BioLegend                                                                 | 353224     |
| GM-CSF bv421 (BVD2-21C11)                                                       | BD                                                                        | 562930     |
| HLA-DR AF700 (L243)                                                             | BioLegend                                                                 | 307626     |
| HLA-DR eFluor 780 (LN3)                                                         | eBioscience                                                               | 47-9956-42 |
| IFNg PE-Cy7 (B27)                                                               | BioLegend                                                                 | 506518     |
| IFN-g BV605 (4S.B3)                                                             | BD                                                                        | 563731     |
| IFN-g AF700 (4S.B3)                                                             | BioLegend                                                                 | 502520     |
| IL-2 PE (MQ1-17H12)                                                             | eBioscience                                                               | 12-7029-42 |
| IL17A APC (BL168)                                                               | BioLegend                                                                 | 512334     |
| IL-17A PerCP-Cy5.5 (eBio64DEC17)                                                | eBioscience                                                               | 45-7179-42 |
| IL-13 PE (JES10-5A2)                                                            | BD                                                                        | 554571     |
| IL-22 PE-Cy7 (22URTI)                                                           | eBioscience                                                               | 25-7229-42 |
| IL-22 PE-PE (22URTI)                                                            | eBioscience                                                               | 12-7229-42 |
| ki67 bv605 (ki67)                                                               | BioLegend                                                                 | 350521     |
| ki-67 PE-Cy7 (SolA15)                                                           | eBioscience                                                               | 25-5698-82 |
| TNFa FITC (Mab11)                                                               | BioLegend                                                                 | 502915     |
| TNFa PE-594 (Mab11)                                                             | BioLegend                                                                 | 502946     |
| TCRgd PerCP-eFluor710 (B1.1)                                                    | eBioscience                                                               | 46-9959    |
| Fixable Viability Dye eFluor™ 780                                               | eBioscience                                                               | 65-0865-14 |
| Fixable Viability Dye eFluor™ 520                                               | eBioscience                                                               | 65-0867-14 |
| eBioscience™ Fixable Viability Dye eFluor™ 506                                  | eBioscience                                                               | 65-0866-14 |
| IF primary antibody: rabbit anti-human NC-1 domain of type VII collagen (LH7.2) | kindly provided by Dr. Alexander Nyström, University of Freiburg, Germany |            |
| IF secondary antibody: goat anti-rabbit A488                                    | ThermoFisher                                                              | A11008     |
| mLy6G (Gr-1) InVivoMab RB6-8C5                                                  | BioXcell                                                                  | BE0075     |
| Cell Proliferation Dye eFluor™ 450                                              | ThermoFisher                                                              | 65-0842-85 |
